# Supplementary material for: Estuarine Ichthyoplankton Studies – A Review
Source: Frontiers journal article supplement (doi:10.3389/fmars.2022.794433), 2022-05-24
Supplement: Table_1.XLSX [file Table_1.XLSX]

## Sheet: Table S1
Table S1. Search conditions and results from 6 different databases.
Database	numbers	search conditions
Web of Science	788	{abstract [("ichthyoplankton" or "eggs" or "larva" or "larvae") and ("fish") and ("estuary" or "estuarine" or "estuaries")] or title [("ichthyoplankton" or "eggs" or "larva" or "larvae" ) and ("fish") and ("estuary" or "estuarine" or "estuaries")] or author keywords [("ichthyoplankton" or "eggs" or "larva" or "larvae" ) and ("fish") and ("estuary" or "estuarine" or "estuaries")]} AND [(Document T…
PubMed	72	abstract/title [("ichthyoplankton" or "eggs" or "larva" or "larvae") and ("fish") and ("estuary" or "estuarine" or "estuaries")
ScienceDirect	0	abstract/title/keyword [("ichthyoplankton" or "eggs" or "larva" or "larvae") and ("fish") and ("estuary" or "estuarine" or "estuarines")
Scopus	878	( TITLE ( ( "ichthyoplankton" OR "eggs" OR "larva" OR "larvae" ) AND ( "fish" ) AND ( "estuary" OR "estuarine" OR "estuaries" ) ) OR ABS ( ( "ichthyoplankton" OR "eggs" OR "larva" OR "larvae" ) AND ( "fish" ) AND ( "estuary" OR "estuarine" OR "estuaries" ) ) OR KEY ( ( "ichthyoplankton" OR "eggs" OR "larva" OR "larvae" ) AND ( "fish" ) AND ( "estuary" OR "estuarine" OR "estuaries" ) ) ) AND ( EXC…
Engineering Village	557	(((( "ichthyoplankton" OR "eggs" OR "larva" OR "larvae" ) AND ( "fish" ) AND ( "estuary" OR "estuarine" OR "estuaries" )) WN AB) OR ((( "ichthyoplankton" OR "eggs" OR "larva" OR "larvae" ) AND ( "fish" ) AND ( "estuary" OR "estuarine" OR "estuaries" )) WN TI)) + {ja} WN DT - ({crustacean} OR {food web} OR {toxicity}) WN CV
CNKI	19	keyword ("ichthyoplankton" + "eggs" + "larva" + "larvae") * ("fish") * ("estuary" + "estuarine" + "estuaries") OR title ("ichthyoplankton" + "eggs" + "larva" + "larvae") * ("fish") * ("estuary" + "estuarine" + "estuaries") OR abstract ("ichthyoplankton" + "eggs" + "larva" + "larvae") * ("fish") * ("estuary" + "estuarine" + "estuaries") AND article type academic journal
total	2314
remove dipulicates	1327

## Sheet: Table S2
Table S2. Ecological categorization and classification basis of estuarine ichthyoplankton.
Survey time	Study area	Ecological categorization	Classification standard	References
1990 -1994	Yangtze River Estuary	freshwater fish	the ecological habits and distribution characteristics of larvae and juveniles	Yang et al., 1990;
		brackish water fish		Luo et al., 1994
		coastal fish
		inshore fish
1990	Western Australia and Southern Africa	opportunistic	ecological habits	Potter et al., 1990
		stragglers
		estuarine
		diadromous
		freshwater
1998	South African Estuaries	marine spawning community	the relationship between spawning area of estuarine fish and estuaries	Whitfield, 1998
		estuary spawning communities
		freshwater spawning communities
		downstream spawning communities
		anadromous spawning communities
2006	Chikugo estuary	narrow salinity	different types of salinity adaptation	Islam et al., 2006a
		moderate salinity
		extensive salinity
		more salinity
2020	Shijiu Port (China)	demersal fish	space distribution characteristics	Wang et al., 2020
		pelagic fish
